# Supplementary material for: Active Immunoprophylaxis and Vaccine Augmentations Mediated by a Novel Plasmid DNA Formulation
Source: PubMed Central journal article supplement (PMC6479233; doi:10.1089/hum.2018.241), 2019-04-04
Supplement: Supp_Fig1.pdf [file Supp_Fig1.pdf]

## Supplementary Data

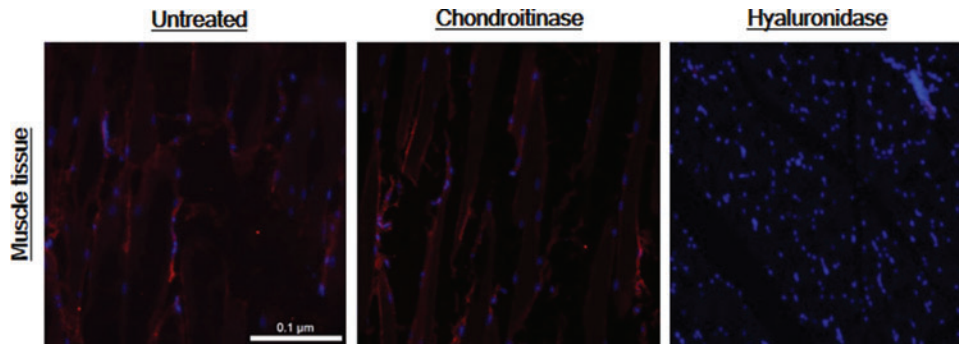

**Supplementary Figure S1.** Chondroitinase does not target hyaluronan in murine muscle tissue. Left TA muscles of C57Bl6 mice were dissected and immediately transferred into 4% paraformaldehyde, and 9 μm sections were incubated with either 2.5 IU/mL Cho ABC or 150 IU/mL hyaluronidase (3 h at 37°C) or were left untreated. Hyaluronan was detected using biotinylated HABP and streptavidin, with Alexa Fluor<sup>®</sup> 555 secondary antibody (red). Nuclei were stained with DAPI (blue).

---
