# Supplementary material for: Active Immunoprophylaxis and Vaccine Augmentations Mediated by a Novel Plasmid DNA Formulation
Source: PubMed Central journal article supplement (PMC6479233; doi:10.1089/hum.2018.241), 2019-04-04
Supplement: Supp_Fig3.pdf [file Supp_Fig3.pdf]

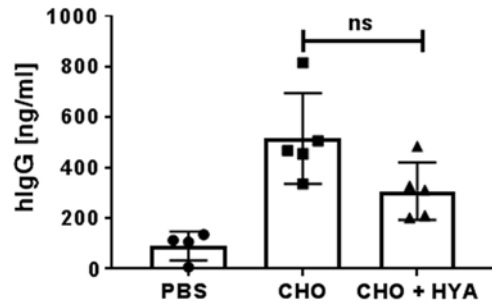

**Supplementary Figure S3.** Combination of Cho ABC with hyaluronidase (Hylenex) does not lead to further enhancement of pDNA-encoded protein expression in NZW rabbits. Rabbits were treated with PBS + pDNA, Cho ABC + pDNA, or Cho ABC + Hylenex + pDNA. Formulations were injected into the left rabbit quad muscle, and EP was initiated 1 min after injection. The graph represents the levels of serum hIgG (ng/mL) measured by ELISA 5 days after pDNA delivery. Animals per group=4-5. Statistics were acquired using Mann-Whitney tests.

---
